# Supplementary material for: Structure-mediated modulation of mRNA abundance by A-to-I editing
Source: PubMed Central journal article supplement (PMC5665907; doi:10.1038/s41467-017-01459-7), 2017-11-02
Supplement: 41467_2017_1459_MOESM2_ESM.pdf [file 41467_2017_1459_MOESM2_ESM.pdf]

## Description of Additional Supplementary Files

File Name: Supplementary Data 1

Description: List of editing sites (included in Figure 6c), their respective gene expression levels and miRNA target information. Each editing site was required to be “edited” (editing level >0.3) in at least 3 individuals and “non-edited” (editing level = 0) in at least 3 individuals. Additionally, the closest predicted miRNA target site was required to be located within 100nt from the editing site. The relative accessibility at the miRNA target site was calculated as log<sub>2</sub> ratio of accessibility of the “G”-containing versus “A”-containing structures, predicted using RNAplfold.

File Name: Supplementary Software 1

Description: A python script to identify the nucleotide in the opposing position of a given editing site in the RNA secondary structure predicted by RNAFold.

File Name: Supplementary Software 2

Description: A python script to calculate the relative accessibility in the RNA secondary structures containing an edited “G” nucleotide vs. a reference “A” nucleotide. This script takes the output file from Supplementary Software 1 as an input file.
